# Supplementary material
Source: publisher figshare collection journal article supplement (https://karger.figshare.com/articles/dataset/_/5241619)
Supplement: Supplementary file 1 [file 1]

## Erratum

---

In the article by Izzi et al., entitled 'Pyrosequencing evaluation of widely available bisulfite conversion methods: considerations for application' [Med Epigenet 2014;2:28–36, DOI: 10.1159/000358882], an error occurred in table 1 for the incubation steps in the protocol 'Cycling 8 h'.

The correct incubation steps are:

95° C for 5 min, 60° C for 30 min, 8 cycles of 95° C for 6 min and 60° C for 30 min, hold at 4° C.
